# Supplementary material for: Reciprocal Interactions between Cadmium-Induced Cell Wall Responses and Oxidative Stress in Plants
Source: Front Plant Sci. 2017 Oct 31;8:1867. doi: 10.3389/fpls.2017.01867 (PMC5671638; doi:10.3389/fpls.2017.01867)
Supplement: Supplementary file 2 [file Table_2.XLSX]

## Sheet: Sheet1
Supplemental table 2: Effects of Cd exposure on peroxidase and laccase activities, H2O2 production and lignification. Both increases in lignifying peroxidases such as guaiacol peroxidase (GPOD) and syringaldazine peroxidase (SPOD) have been linked to increased lignification. This table provides an overview of studies where both POD activities and lignification were quantitatively measured. Additi…
Reference	Exposure			Plant species	Organ	GPOD	SPOD	LAC	H2O2	Lignin
Finger-Teixeira et al., 2010	25 µM	CdCl2	24 hours	Glycine maximus	Roots	-			-	é
	50 µM					é			é	é
	75 µM					é			é	é
	100 µM					é			é	é
Yang et al., 2007	1 µM	CdCl2	12 hours	Glycine maximus	Roots	-		-		é
			24 hours					é		é
			48 hours			é		é		é
Kováčik et al., 2008	3 µM	CdCl2	7 days	Matricaria chamomilla	Roots	-				-
	60 µM					é				é
	120 µM					é				é
Kováčik et al., 2010	60 µM	CdCl2	7 days	Matricaria chamomilla (diploid)	Roots	é				é
				Matricaria chamomilla (tetraploid)	Roots	é				é
Kováčik et al., 2011	60 µM	CdCl2	7 days	Matricaria chamomilla	Leaves	é			é	NA
					Roots	é			é	é
Chang et al., 2012	50 µM	CdCl2	96 hours	Oryza sativa (Cd sensitive)	Roots	NA			-	-
	100 µM					NA			é	-
	150 µM					-			é	-
	50 µM			Oryza sativa (Cd tolerant)	Roots	NA			-	-
	100 µM					NA			é	é
	150 µM					-			é	é
Schützendübel et al., 2001	5 µM	CdSO4	6 hours	Pinus sylvestris	Roots	-				-
			24 hours			é				-
			48 hours			é				-
			96 hours			é				-
	50 µM		6 hours			-				-
			24 hours			-				-
			48 hours			é				é
			96 hours			é				é
Elobeid et al., 2012	50 µM	CdSO4	24 days	Populus canescens	Stem	é				é
					Roots	é				é
Rui et al., 2016	10 µM	CdCl2	7 days	Vicia sativa (Cd sensitive)	Roots	é	é	é	NA	é
	25 µM					é	é	é	é	é
	50 µM					é	é	é	NA	é
	10 µM			Vicia sativa (Cd tolerant)	Roots	-	-	-	NA	-
	25 µM					-	é	é	é	é
	50 µM					é	é	é	NA	é
